## Corrigendum

### **SCD1 is required for cell cytokinesis and polarized cell expansion in *Arabidopsis thaliana***

Falbel, T. G., Koch, L. M., Nadeau, J. A., Segui-Simarro, J. M., Sack, F. D. and Bednarek, S. Y. *Development* **130**, 4011-4024.

An error in the title of this article was not corrected before going to press.

The title should read:

### **SCD1 is required for cytokinesis and polarized cell expansion in *Arabidopsis thaliana***

The authors apologise to readers for this mistake.
